# Supplementary material for: Superhydrophobic microstructures for better anti-icing performances: open-cell or closed-cell?
Source: Royal Society of Chemistry journal article supplement (doi:10.1039/d2mh01083f), 2022-11-02
Supplement: d2mh01083f4.pdf [file d2mh01083f4.pdf]

## Supplementary Information

# Superhydrophobic Microstructures for Better Anti-Icing Performances: Open-Cell or Closed-Cell?

*Lizhong Wang<sup>1</sup>, Guochen Jiang<sup>1</sup>, Ze Tian<sup>1</sup>, Changhao Chen<sup>1</sup>, Xinyu Hu<sup>1</sup>, Rui Peng<sup>1</sup>, Hongjun Zhang<sup>1</sup>, Peixun Fan<sup>1</sup> and Minlin Zhong<sup>1\*</sup>*

*<sup>1</sup>Laser Materials Processing Research Center, Key Laboratory for Advanced Materials Processing Technology (Ministry of Education), Joint Research Center for Advanced Materials & Anti-icing of Tsinghua University (SMSE)-AVIC ARI, School of Materials Science and Engineering, Tsinghua University, Beijing 100084, P. R. China*

Correspondence to: [zhml@tsinghua.edu.cn](mailto:zhml@tsinghua.edu.cn)

**This Supplemental Information includes:**

- S1. Laser fabricating parameters of patterned micro-nanostructures
- S2. Superhydrophobicity characterization of patterned micro-nanostructures
- S3. Superhydrophobic durability tests of different patterned surfaces at room temperatures
- S4. Constructed thermodynamically closed systems and open systems on patterned surfaces
- S5. Icing & melting cycles on different patterned surfaces
- S6. Calculation of air pocket pressures on the open-cell structures and the closed-cell structures
- S7. Calculation of interfacial thermal resistances on different patterned surfaces
- S8. Calculation of total bubbles volume in the ice droplet
- S9. Icing & melting cycle tests on copper substrates
- S10. Durability analyses of different patterned surfaces after multiple deicing cycles
- S11. Observations of condensation processes on open-cell structures.

**Other Supplementary Materials for this paper include:**

Movie S1: Icing & melting cycle on different patterned surfaces (MP4)

Movie S2: Ice adhesion strengths on the closed-cell and the open-cell surfaces (MP4)

Movie S3: Condensation frosting processes (MP4)

**S1. Laser fabricating parameters of patterned micro-nanostructures**

The laser processing parameters of patterned micro-nanostructured surfaces are presented in Table S1. The micro-nanostructured topologies of surfaces are shown in Figure 1f. By adjusting the laser scanning paths (Figure S1), the patterns can be facily tuned. Under the same processing parameters, the microstructure heights and intervals of different patterned surfaces are fixed at 45  $\mu\text{m}$  and 35  $\mu\text{m}$ , respectively.

**Table S1.** Laser processing parameters for fabricating micro-nanostructures.

| Processing         | Laser                                 | Scanning                          | Repetition<br>Rate | Pulse    | Scanning         | Scanning                   |
|--------------------|---------------------------------------|-----------------------------------|--------------------|----------|------------------|----------------------------|
|                    | Fluence<br>( $\text{J}/\text{cm}^2$ ) | Speed<br>( $\text{mm}/\text{s}$ ) |                    | Duration | Route            | Pitch<br>( $\mu\text{m}$ ) |
| One<br>Irradiation | 0.5-3.8                               | 300-600                           | 200kHz             | 800fs    | Line<br>Scanning | 35                         |

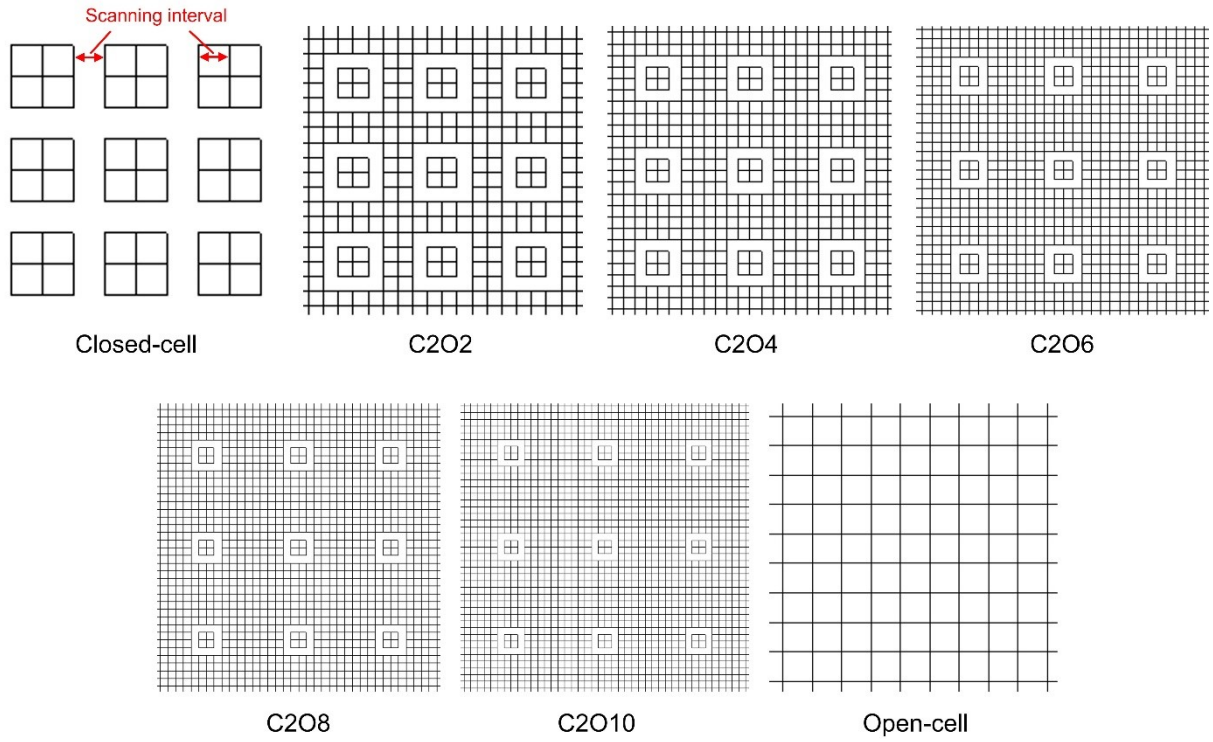

**Fig. S1** Laser scanning paths realizing the fabrication of tunable patterned micro-nanostructures

## S2. Superhydrophobicity characterization of patterned micro-nanostructures

In terms of structural characteristics, the solid fractions of different surfaces can be expressed by:

$$f = \begin{cases} \frac{(i^2 - 1)B^2 + 2(i + 1)B\Lambda}{(i + 1)^2\Lambda^2} & (\text{Closed cell, } j = 0) \\ \frac{[(i + j)^2 + 4j]B^2 + 4(i + 1)B\Lambda}{(2 + i + j)^2\Lambda^2} & (\text{Hybrid cell, } i, j \neq 0) \\ \frac{B^2}{\Lambda^2} & (\text{Open cell}) \end{cases} \quad (\text{S1})$$

where  $i$  and  $j$  denote the number of microcones in the microframes and outside the microframes of  $C_iO_j$  surfaces, respectively;  $B$  is the peak width of microcones;  $\Lambda$  is the periodical distance of microcones. The solid fractions and contact angles of different surfaces are shown in Table S2 and Figure S2.

**Table S2.** Solid fractions and superhydrophobicity of different micro-nanostructures. Open-I35 and Open-I45 surfaces denote the open-cell surfaces with the same microcone height of 45  $\mu\text{m}$  but different microcone intervals of 35  $\mu\text{m}$  and 45  $\mu\text{m}$ , respectively.

| Types  | ROTs | Solid fractions<br>$f$ | Apparent                    |                              |                               |
|--------|------|------------------------|-----------------------------|------------------------------|-------------------------------|
|        |      |                        | contact angle<br>$\theta_0$ | Receding angle<br>$\theta_r$ | Advancing angle<br>$\theta_a$ |
| Closed | 0    | 0.081                  | $158.4^\circ \pm 1.2^\circ$ | $157.7^\circ \pm 0.6^\circ$  | $162.3^\circ \pm 0.7^\circ$   |
| C202   | 0.56 | 0.047                  | $159.5^\circ \pm 0.8^\circ$ | $157.8^\circ \pm 1.1^\circ$  | $162.1^\circ \pm 0.5^\circ$   |
| C204   | 0.75 | 0.032                  | $159.3^\circ \pm 0.7^\circ$ | $158.4^\circ \pm 1.9^\circ$  | $161.9^\circ \pm 2.5^\circ$   |
| C206   | 0.84 | 0.025                  | $160.5^\circ \pm 0.3^\circ$ | $158.5^\circ \pm 0.7^\circ$  | $162.4^\circ \pm 1.2^\circ$   |

|          |      |       |                             |                             |                             |
|----------|------|-------|-----------------------------|-----------------------------|-----------------------------|
| C208     | 0.89 | 0.021 | $159.6^\circ \pm 1.0^\circ$ | $158.9^\circ \pm 0.3^\circ$ | $162.8^\circ \pm 0.7^\circ$ |
| C2010    | 0.92 | 0.019 | $158.8^\circ \pm 0.5^\circ$ | $158.5^\circ \pm 0.9^\circ$ | $162.5^\circ \pm 0.8^\circ$ |
| Open-I35 | 1    | 0.013 | $160.4^\circ \pm 0.8^\circ$ | $157.7^\circ \pm 1.1^\circ$ | $161.7^\circ \pm 1.8^\circ$ |
| Open-I45 | 1    | 0.11  | $158.3^\circ \pm 1.1^\circ$ | $156.9^\circ \pm 1.6^\circ$ | $162.5^\circ \pm 0.1^\circ$ |

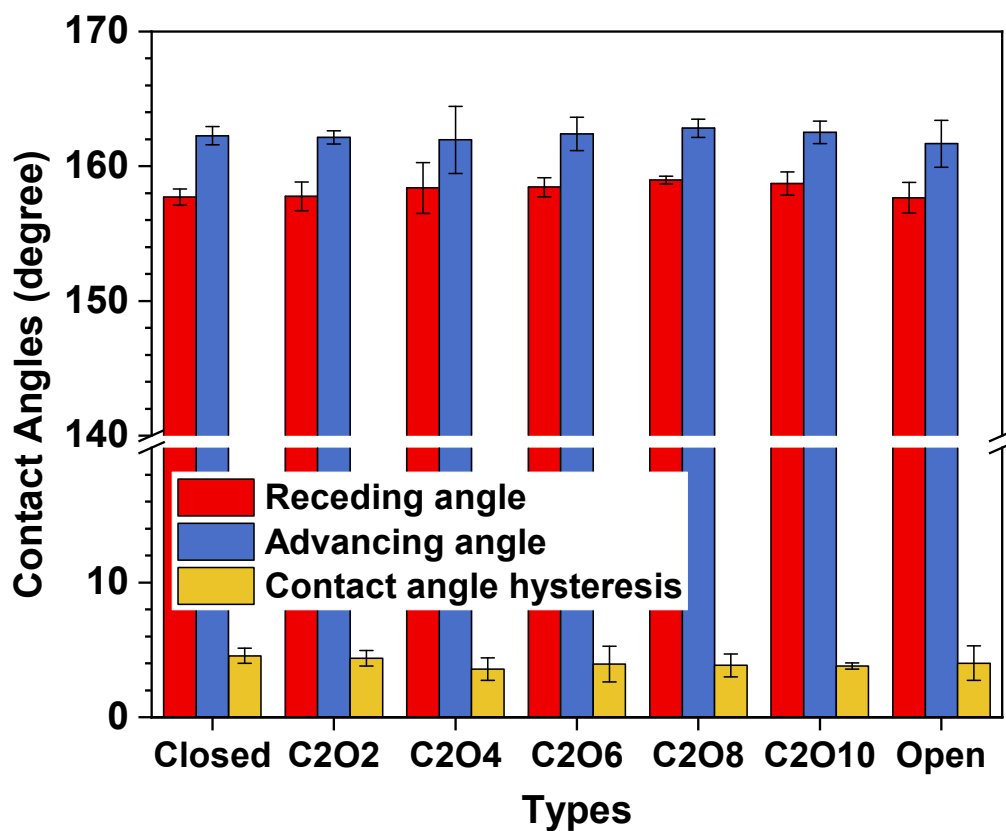

**Fig. S2** Contact angles including receding angles, advancing angles and contact angle hysteresis. Data are mean  $\pm$  s.d. from at least three independent measurements.

### S3. Superhydrophobic durability tests of different patterned surfaces at room temperatures

Linear abrasion tests were performed to examine the superhydrophobic durability of different surfaces. The ambient temperature and humidity during tests are  $15 \pm 1$  °C and  $20 \pm 5\%$ . 300 grit sandpapers (727 CW) were adopted to abrade the surfaces under the loaded pressures of 12.25 kPa. One abrasion cycle was defined as a 20 cm motion of the measured surfaces on the abrasives.

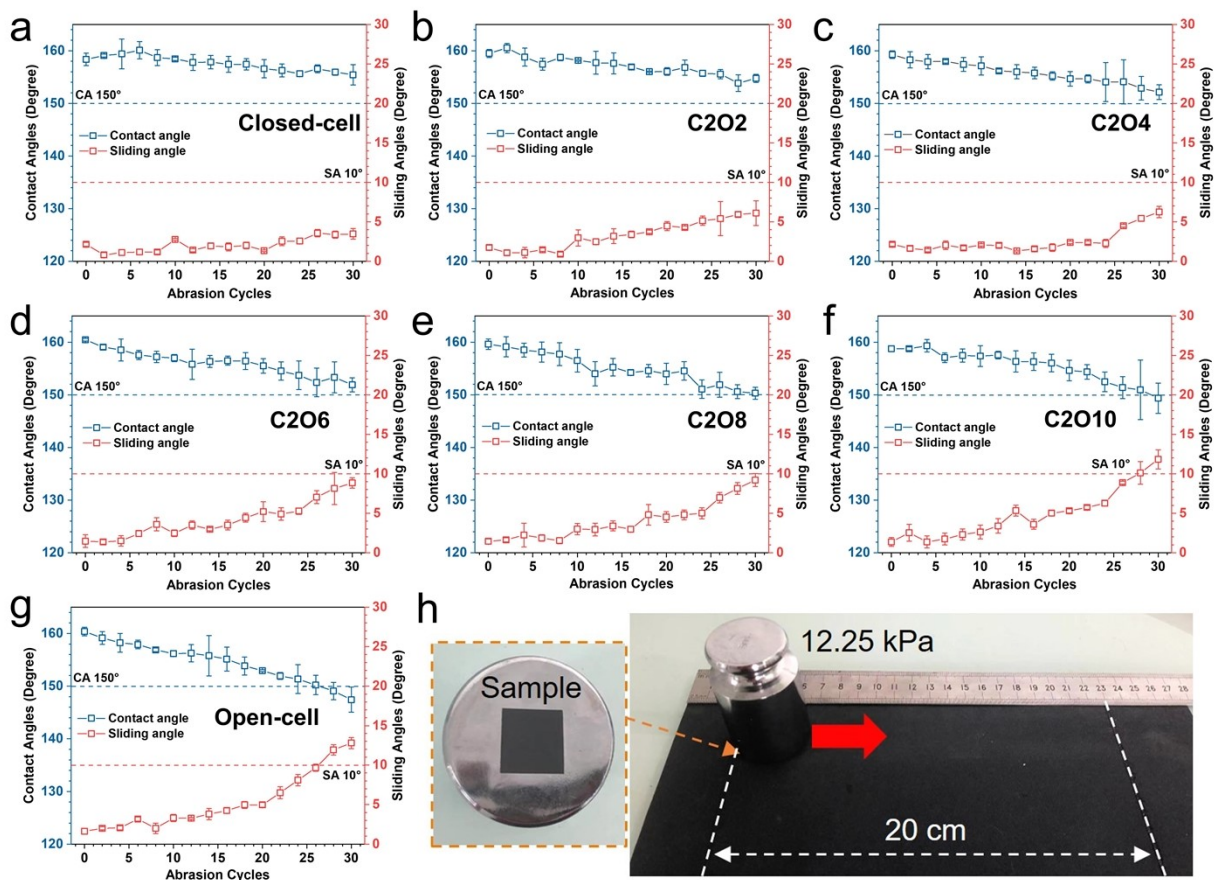

**Fig. S3** Superhydrophobic durability tests of different surfaces at room temperatures. (a) Closed-cell surfaces. (b) C202 surfaces. (c) C204 surfaces. (d) C206 surfaces. (e) C208 surfaces. (f) C2010 surfaces. (g) Open-cell

surfaces. (h) Photographs of durability experiment processes. The superhydrophobic evaluation standards with contact angles of more than  $150^\circ$  and sliding angles of less than  $10^\circ$  are marked in the figures. The linear abrasion direction and the abrasion distance are also shown. Data are mean  $\pm$  s.d. from at least three independent measurements.

#### S4. Constructed thermodynamically closed systems and open systems on patterned surfaces

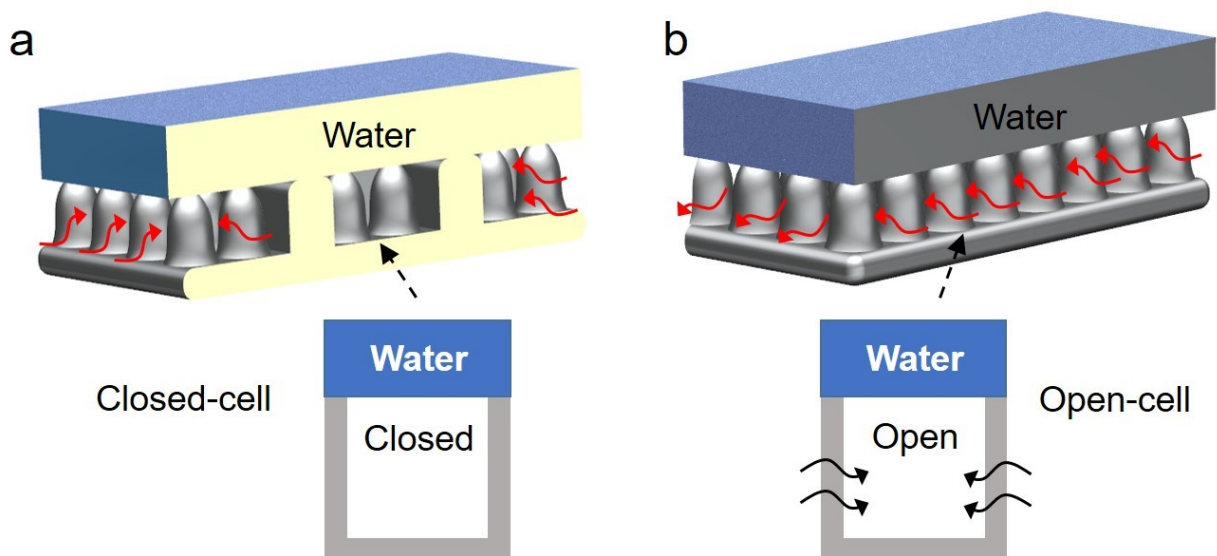

**Fig. S4** Comparison of the closed-cell structures and the open-cell structures. (a) C2O2 surfaces consisting of open-cell structures and closed-cell structures. (b) Open-cell surfaces. In open-cell structures, air can freely flow and exchange, forming thermodynamically open systems. While in the closed-cell structures, the air pocket gas is restricted in the closed system, unable to be supplied from the ambient atmosphere. The corresponding schematics are shown. Red and black arrows denote the directions of gas flowing.



## S5. Icing & melting cycles on different patterned surfaces

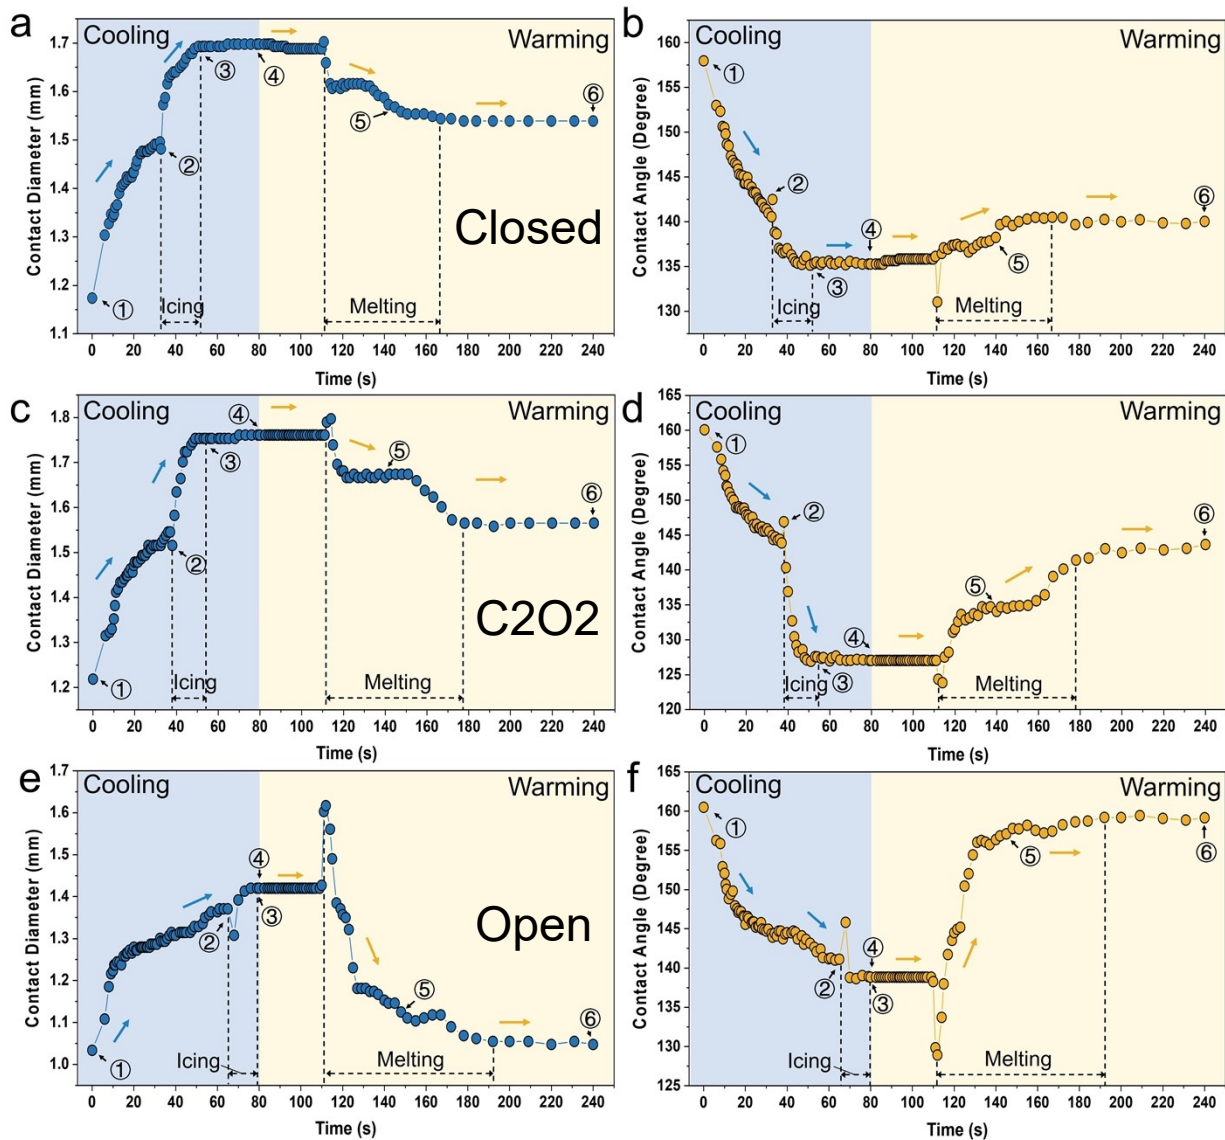

**Fig. S5** Contact diameters and contact angles versus icing & melting cycle time: (a-b) Closed-cell surfaces; (c-d) C2O2 surfaces; (e-f) Open-cell surfaces. The blue zone denotes the icing processes while the orange zone denotes the melting processes. Icing zones and melting zones are divided by black dashed lines. Blue arrows and orange arrows denote the circulation directions of icing processes and melting processes, respectively. The

marked different states are corresponded to the droplet states in Figure 2. The fluctuations of the correlation evaluations are described in the Experimental section.

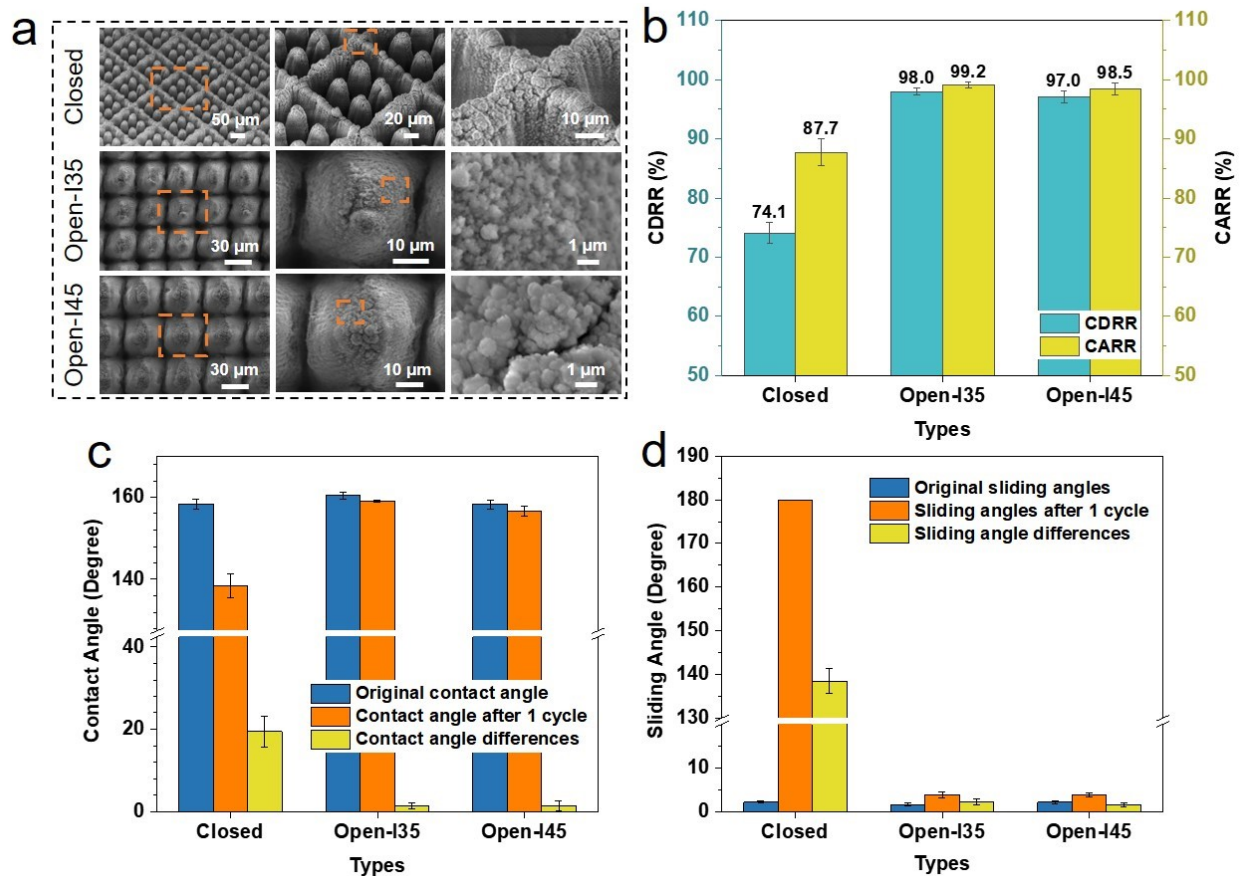

**Fig. S6** Icing & melting cycle tests on micro-nanostructured surfaces with similar solid fractions but different patterns. (a) SEM images of the closed-cell surfaces ( $f = 0.081$ ), open-I35 surfaces ( $f = 0.013$ ) and open-I45 surfaces ( $f = 0.11$ ). (b) CDRR and CARR of different surfaces after icing & melting cycles. (c) and (d) denote the changes of contact angles and sliding angles during icing & melting cycles, respectively. Data are mean  $\pm$  s.d. from at least three independent measurements.

## S6. Calculation of air pocket pressures on the open-cell structures and the closed-cell structures

The air pocket pressure on the open-cell structures can be calculated by:

$$P_{apo} = P_0 \ln \frac{H_p}{H_p - (H_m^{eff})_{max}} \quad (S2)$$

$$(H_m^{eff})_{max} = \frac{f_1}{(1-f_1)} \left( \sqrt{\frac{\pi}{2f_1}} - 1 \right)^3 (H_m)_{max} \quad (S3)$$

$$H_m^{eff} = \frac{r_{eff}^g (2 - 3\sin\alpha_1 + \sin^3\alpha_1)}{-3\cos^3\alpha_1} \quad (S4)$$

$$r_{eff}^g = (\sqrt{\pi/2f_1} - 1)r_p \quad (S5)$$

where  $r_{eff}^g$  denotes the equivalent geometric radius for hierarchically structured surfaces with pillars, respectively;  $f_1$  is the area fraction of micropillars, which is 0.16 in this work;  $r_p$  is the pillar radius, which is 7.9  $\mu\text{m}$  in this work;  $\alpha_1$  denotes the sag angle of the liquid-vapor interface;  $P_{apo}$  is the pressure of trapped air pockets in closed-cell systems;  $P_0$  denotes the ambient air pressure, which keeps the constant value ( $1.0135 \times 10^5 \text{ Pa}$  at 15  $^\circ\text{C}$ ) in the closed-cell systems but varies as the ambient temperature changes in open-cell systems,  $P_0 = 1.04 - 2.69 \times 10^{-12} e^{T/1.44} - 0.016 e^{T/37.29} \text{ bar}$ ;  $T$  is the temperature of the air pocket;  $H_p$  is the pillar height;  $H_m^{eff}$  is the equivalent value of  $H_m$ ;  $H_m$  is the meniscus height;  $(H_m^{eff})_{max}$  denotes the maximum of  $H_m^{eff}$ , where  $\alpha_1$  is equal to  $\theta_{adv}$ .

Different from the open-cell structures, the dissolution of air pocket gas in supercooled droplets on the closed-cell structures can lead to the decrease of gas amount. Meanwhile,  $P_0$  on the closed-cell structures is the original atmospheric pressure before the icing & melting cycle, which is different from that on the open-cell structures. Hence considering these factors, the air pocket pressure on the closed-cell structures is expressed by:

$$\begin{cases} P_{c0}V_{c0} = \frac{V_{c0}}{V_m}RT_0 \\ P_{apc}V_{c0} = \frac{V_{c0} - V_{c0}[\alpha(T) - \alpha(T_0)]}{V_m}RT \end{cases} \quad (S6)$$

where  $P_{c0}$  denotes the pressure of trapped air pockets in the original state of the closed-cell;  $V_{c0}$  is the volume of the air pocket;  $V_m$  is the molar volume of gas;  $R$  is the ideal gas constant;  $T_0$  is the original ambient temperature;  $P_{apc}$  is the pressure of air pockets in the closed-cell systems;  $\alpha(T)$  is the air solubility in water,  $\alpha(T) = A + BT + CT^2 = (29 - 0.7T + 0.008T^2) \times 10^{-3}$ ;  $r_c$  is the effective radius in the closed-cell, which is  $31.8 \mu m$  in this work. By simplifying eq S5, the below equation is obtained:

$$P_{apc} = P_{c0} \left\{ 1 - [\alpha(T) - \alpha(T_0)] \right\} \frac{T}{T_0} \quad (S7)$$

For the air pocket pressure in the original state of the closed-cell structures, it can be calculated by:

$$P_{c0} = P_0 \ln \frac{H_p}{H_p - (H_m)_{max}} \quad (S8)$$

$$H_m = \frac{r_c(2 - 3\sin\alpha_1 + \sin^3\alpha_1)}{-3\cos^3\alpha_1} \quad (S9)$$

Combining eq S6-9, the air pocket pressure on the closed-cell structures is expressed by:

$$P_{apc} = P_0 \ln \frac{H_p}{H_p - (H_m)_{max}} \{1 - (T - T_0)[B + C(T + T_0)]\} \frac{T}{T_0} \quad (S10)$$

In terms of eq S2 and S10. The evolutions of air pocket pressure with the temperature and the ratio of the open-structural area to the total area of one cell (ROT) are obtained in Figure S7.

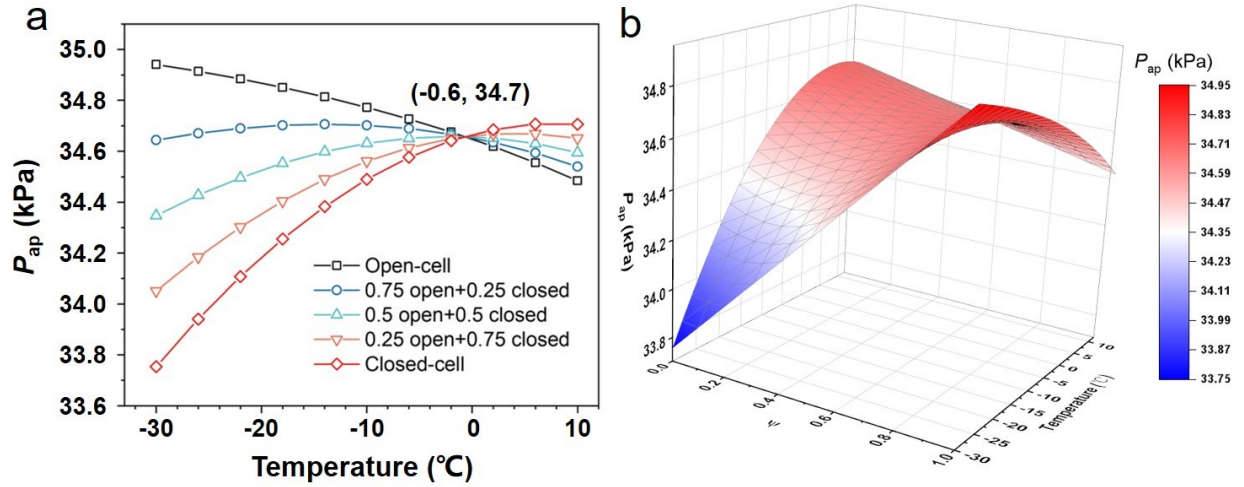

**Fig. S7** Evolutions of air pocket pressure with the temperature and the ROTs. (a) The air pocket pressures at different temperatures and on the surfaces with different ROTs. (b) Three-dimension phase diagram.

## S7. Calculation of interfacial thermal resistances on different patterned surfaces

Based on quasi-static thermal current model, the thermal resistance of microstructures is expressed by eq S11, and that of air pocket layer is expressed by eq S12. The total interfacial thermal resistance is obtained in eq S13

$$R_s = \frac{1}{\pi r_d^2 f \cdot \sin^2 \theta} \left( \frac{\delta_c}{k_c} + \frac{\delta_m}{k_m} \right) \quad (\text{S11})$$

$$R_a = \frac{1}{\pi r_d^2 (1-f) \sin^2 \theta} \cdot \frac{\delta_a}{k_a} \quad (\text{S12})$$

$$R_{total} = \frac{\delta_a (k_m \delta_c + k_c \delta_m)}{\pi r_d^2 \sin^2 \theta [f k_c k_m \delta_a + (1-f) k_a (k_m \delta_c + k_c \delta_m)]} \quad (\text{S13})$$

where  $R_s$  and  $R_a$  are the thermal resistances of solid microstructures and air pocket layer, respectively;  $R_{total}$  is the total thermal resistance;  $r_d$  is the droplet radius;  $f$  is the surface solid fraction;  $\theta$  denotes the apparent contact angle;  $\delta_c$ ,  $\delta_m$  and  $\delta_a$  denote the thickness of superhydrophobic coatings, microstructures and the air pocket layer;  $k_c$ ,  $k_m$  and  $k_a$  denote the thermal conductivity of superhydrophobic coatings, microstructures and the air pocket layer. In

our work,  $\delta_c = 10 \text{ nm}$ ,  $\delta_m = \delta_a = 45 \text{ }\mu\text{m}$ ,  $k_c = 0.1 \text{ W}\cdot\text{m}^{-1}\cdot\text{K}^{-1}$ ,  $k_m = 154.11 \text{ W}\cdot\text{m}^{-1}\cdot\text{K}^{-1}$ . Figure S8 shows the interfacial thermal resistances on different surfaces.

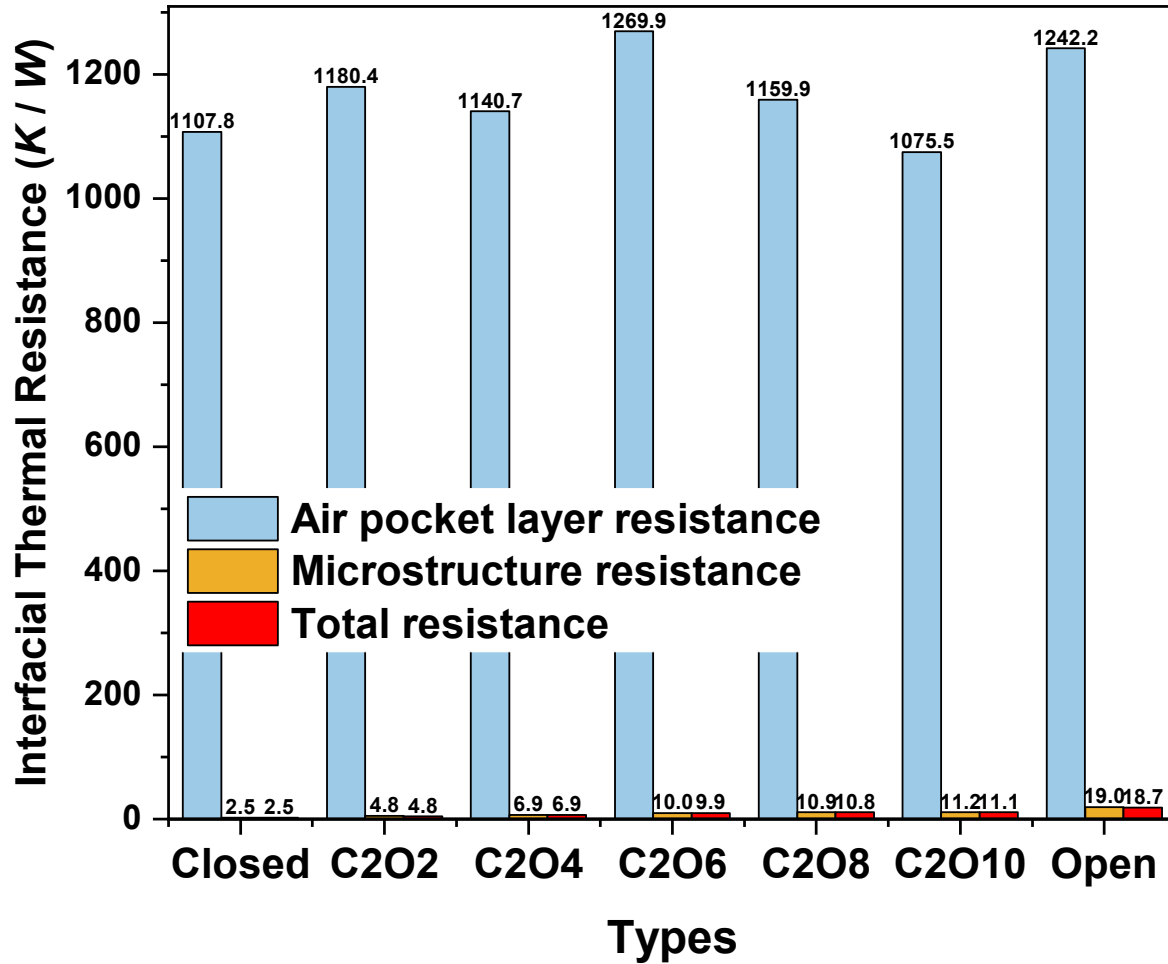

Fig. S8 Interfacial thermal resistances between droplets and different surfaces.

## S8. Calculation of total bubbles volume in the ice droplet

Owing to the limitation of characterization devices, the datum of 3D bubbles in ice droplets cannot yet be constructed and obtained in experiments. However, by combing the theoretical calculations and experimental results, the total bubble volume in the ice droplets can still be obtained. The total bubbles volume is expressed as:

$$V_{tb} = \pi \left(1 + \frac{1}{\nu\alpha}\right)^{-1} \int_0^t \left[ (r_d^2 \sin^2 \theta - 2S_t D \cdot t - 2r_d (2S_t D \cdot t)^{1/2} \cos \theta) \cdot \left(\frac{S_t D}{2t}\right)^{1/2} \right] dt \quad (\text{S14})$$

While  $\nu$  denotes the density ratio of ice and water, in this work, we take 0.92;  $\alpha$  is the air solubility in the supercooled water, which takes 3.6%, 4.4%, 5.04% when the temperature of the supercooled water is -5 °C, -10 °C, -15 °C, respectively;  $S_t$  denotes the Stefan number,  $S_t = C_p \Delta T_c / L_m$ ;  $D$  is the thermal diffusivity,  $D = \lambda_{ice} / (\rho_{ice} C_p)$ ;  $t$  denotes the icing time, recorded from the beginning of icing;  $C_p$  represents the heat capacity at the constant pressure;  $\Delta T_c$  is the supercooled temperature;  $L_m$  is the latent heat during the freezing processes;  $\rho_{ice}$  is the ice density;  $\lambda_{ice}$  is the thermal conductivity of ice.



### S9. Icing & melting cycle tests on copper substrates

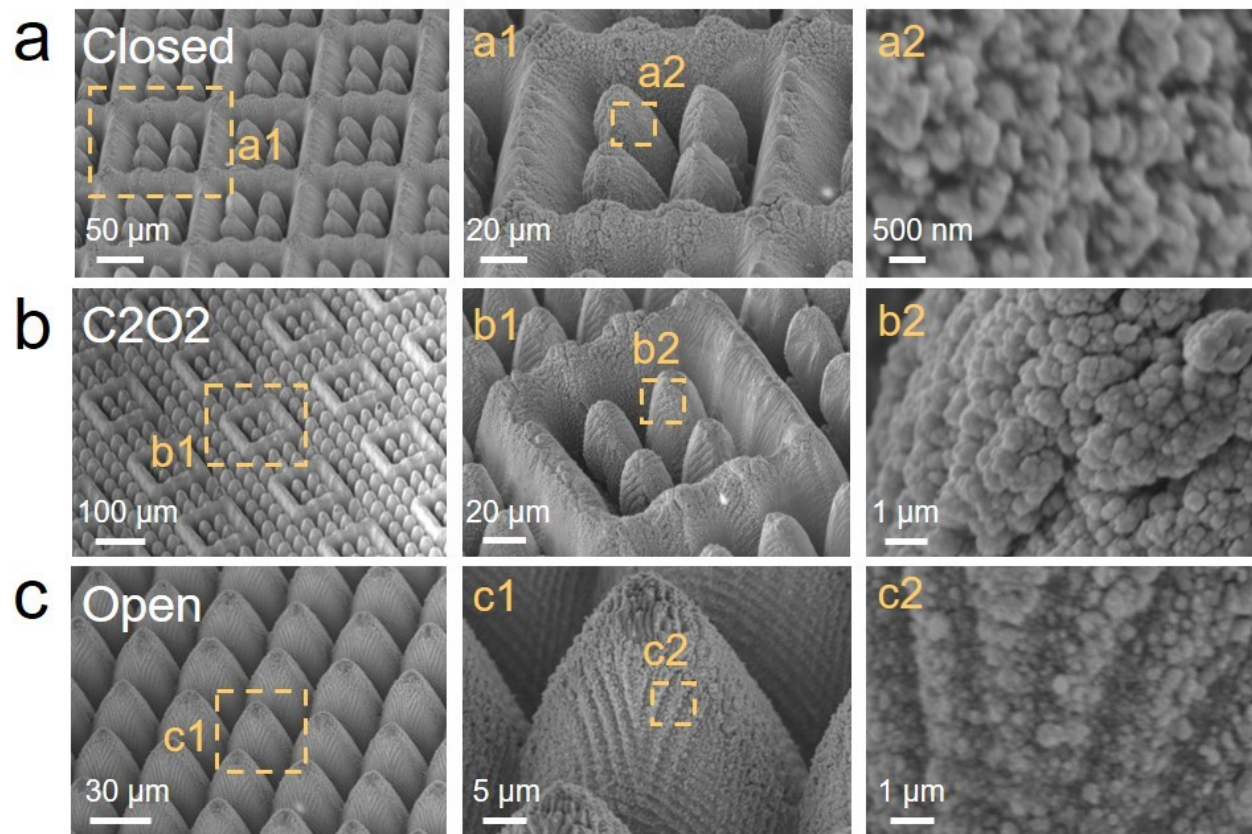

**Fig. S9** SEM images of three patterns on copper substrates: open-cell, C2O2 and closed-cell.

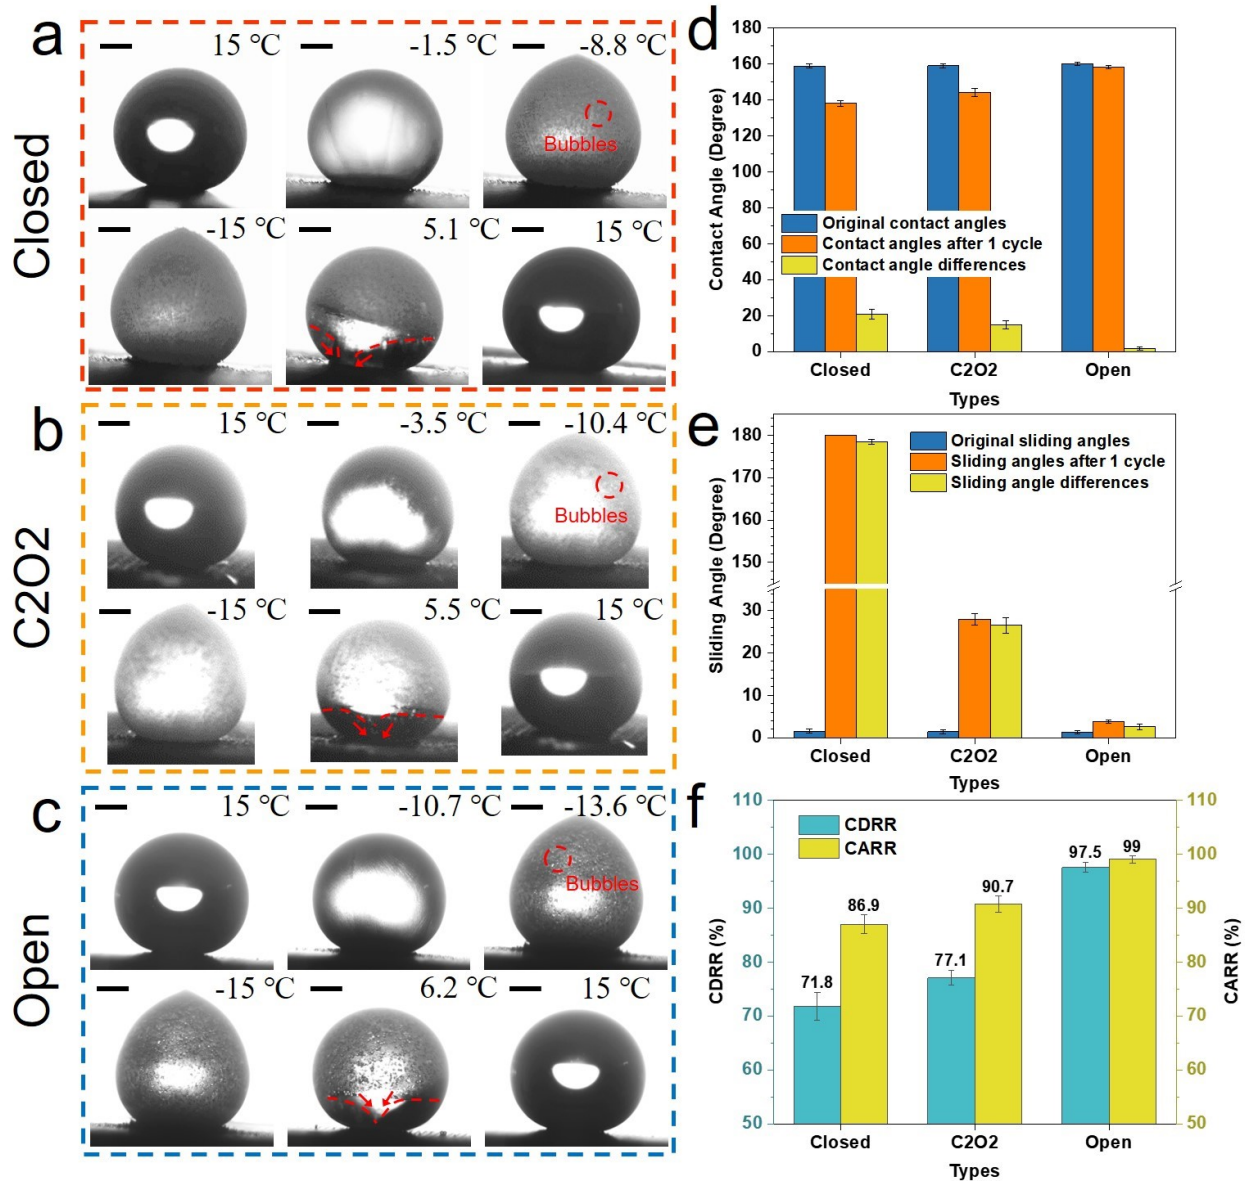

**Fig. S10** Icing & melting cycle results on the copper patterned substrates. (a-c) Droplet state changes during cycles: (a) closed-cell; (b) C2O2; (c) open-cell. Scale bars are 500  $\mu\text{m}$ . (d) and (e) denote changes of contact angles and sliding angles during icing & melting cycles, respectively. (f) CDRR and CARR of different surfaces. The tested copper samples have the high thermal conductivity of  $397 \text{ W} \cdot \text{m}^{-1} \text{K}^{-1}$ . Data are mean  $\pm$  s.d. from at least three independent measurements.

**S10. Durability analyses of different patterned surfaces after multiple deicing cycles**

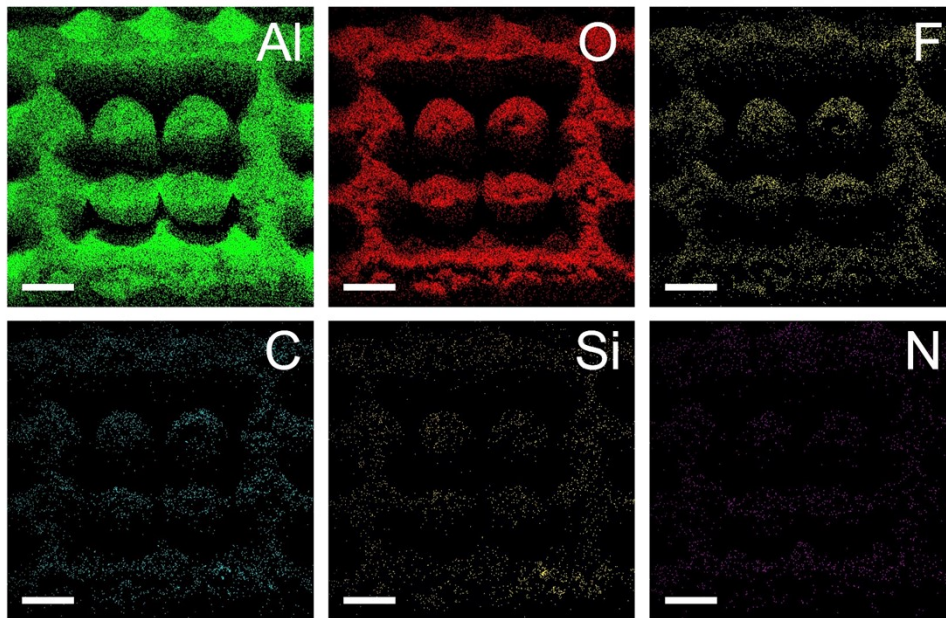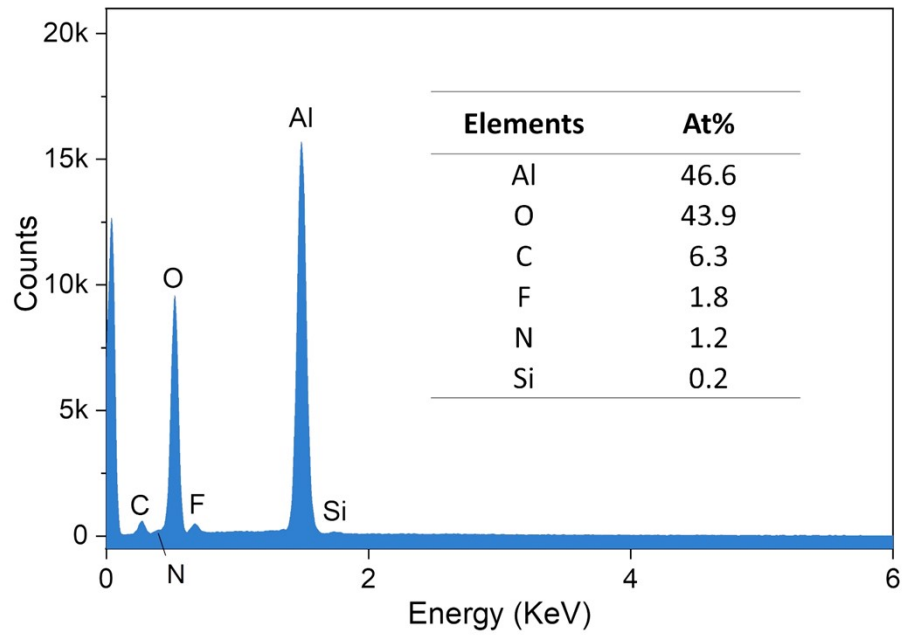

**Fig. S11** EDS mappings and elemental ratios on the closed-cell structures after 10 deicing cycles. It can be clearly observed that the elements of F and C on the tops of microframes and microcones have been greatly lost, which leads to the deterioration of superhydrophobicity and icephobicity. Scale bars are 25  $\mu\text{m}$ .

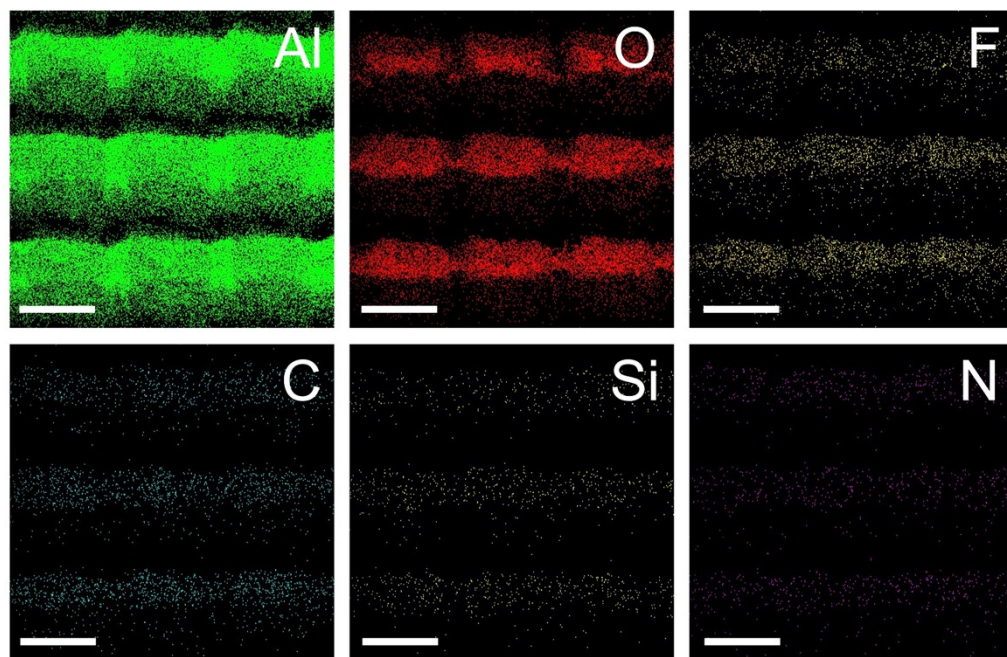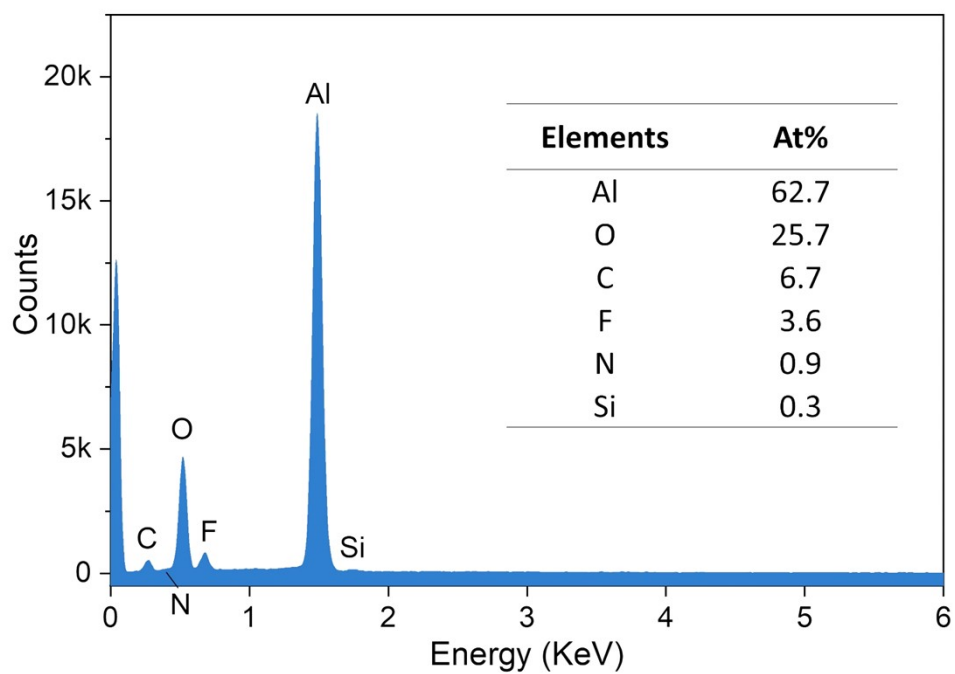

**Fig. S12** EDS mappings and elemental ratios on the open-cell structures after 10 deicing cycles. It is found that the elements on the open-cell structures have no obvious variation. Abundant F and C elements after 10 deicing cycles ensure the well icephobic durability of open-cell surfaces. Scale bars are 25  $\mu\text{m}$ .

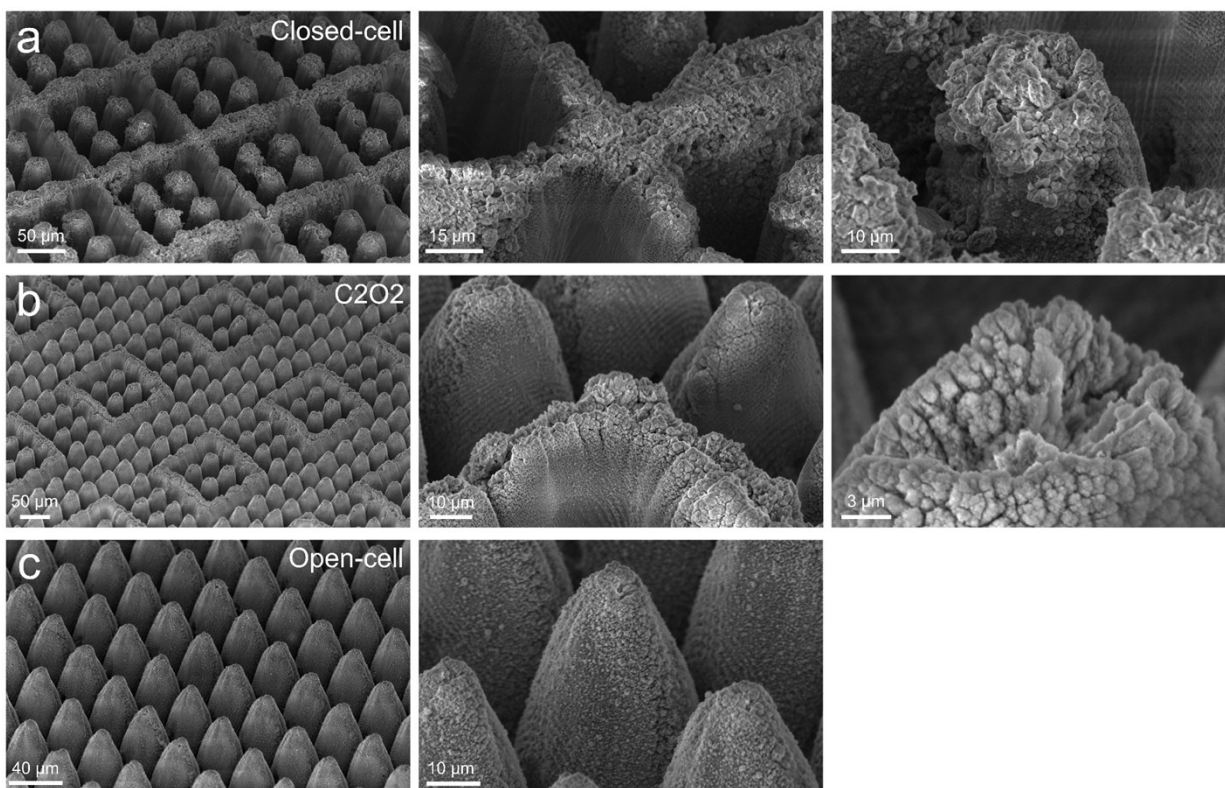

**Fig. S13** SEM images of different patterned surfaces after 10 deicing cycles. (a) Closed-cell surfaces. (b) C2O2 surfaces. (c) Open-cell surfaces. After 10 deicing cycles, the microframes and the enclosed microcones on the closed-cell surfaces have been greatly damaged. On the C2O2 surfaces, although the microframes and their enclosed microcones are also abraded, the open microcones outside the microframes have no obvious damage. Meanwhile, it can be apparently observed that the micro-nanostructures on the open-cell surfaces remain intact. The undamaged micro-nanostructures and chemical elements on the open-cell surfaces guarantee the ice easy-removal after multiple deicing cycles.

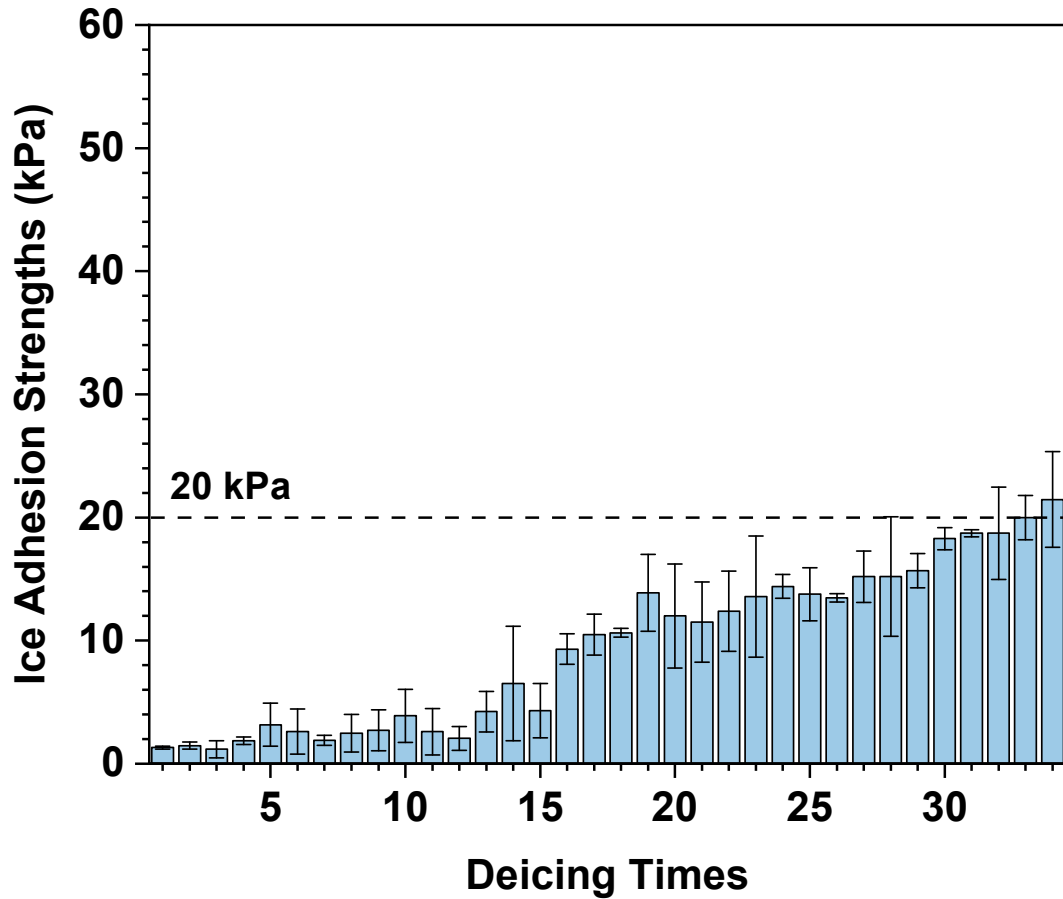

**Fig. S14** Icephobic durability tests on the open-cell surfaces. Generally, 20 kPa is regarded as the benchmark for ensuring passive ice removal under external wind blow or slight vibration. It can be found that even after 33 deicing cycles, the ice adhesion strengths on the open-cell surfaces can still maintain below 20 kPa, well guaranteeing the long-term icephobicity. Data are mean  $\pm$  s.d. from at least three independent measurements.

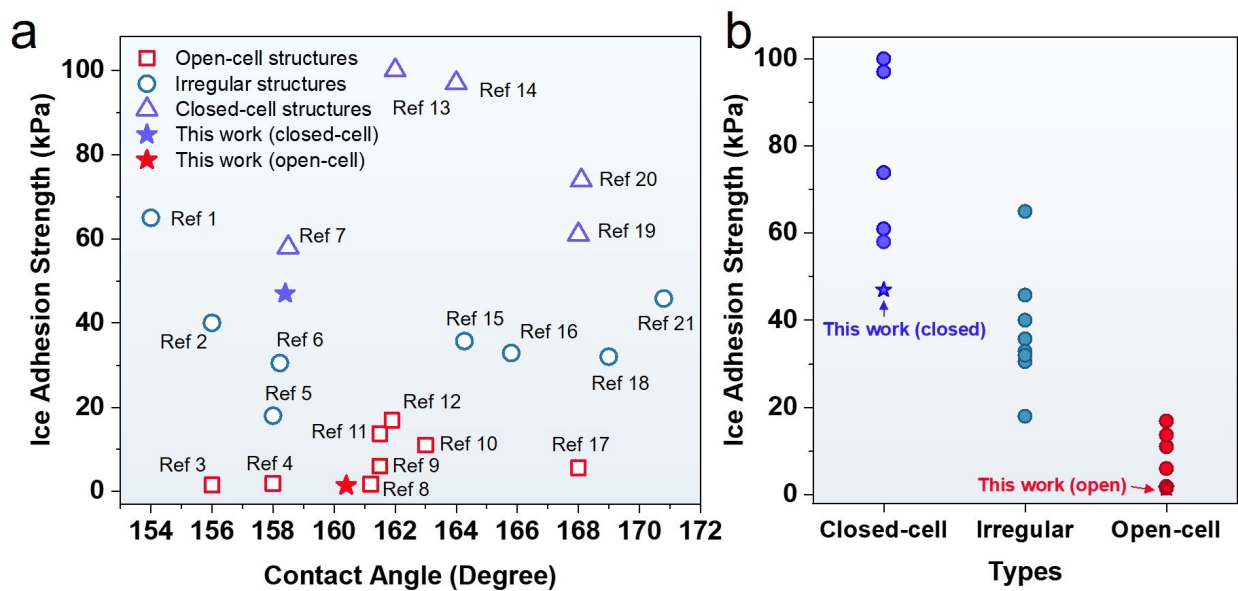

**Fig. S15** Comparison of ice adhesion strengths between our fabricated surfaces and other reported superhydrophobic surfaces. (a) Ice adhesion strengths versus water contact angles. Red boxes, blue rounds and purple triangles denote the reported open-cell, irregular and closed-cell surfaces, respectively. Red and purple five-pointed stars denote our fabricated open-cell and closed-cell surfaces. (b) Ice adhesion strengths of different types of surfaces. Data is taken from the literature<sup>1-21</sup>.

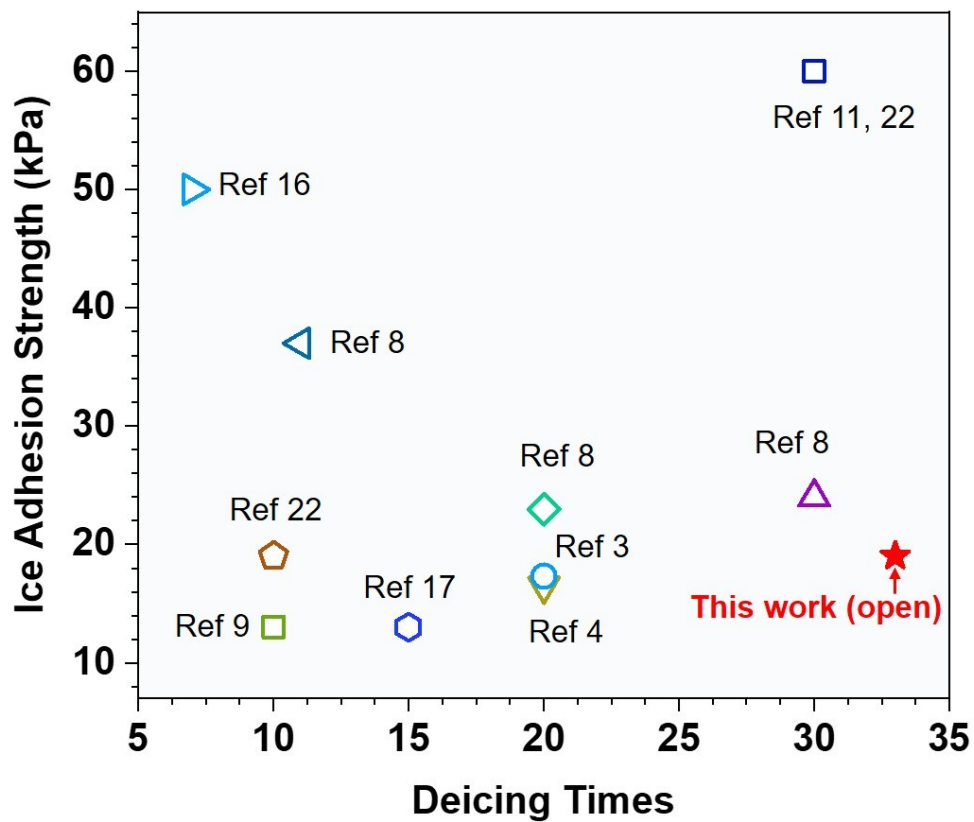

**Fig. S16** Comparison of ice adhesion strengths after multiple deicing times between our fabricated surfaces and other reported superhydrophobic surfaces. Red five-pointed stars denotes our fabricated open-cell surfaces. Data is taken from the literature<sup>3, 4, 8, 9, 11, 16, 17, 22</sup>.



**S11. Observations of condensation processes on open-cell structures.**

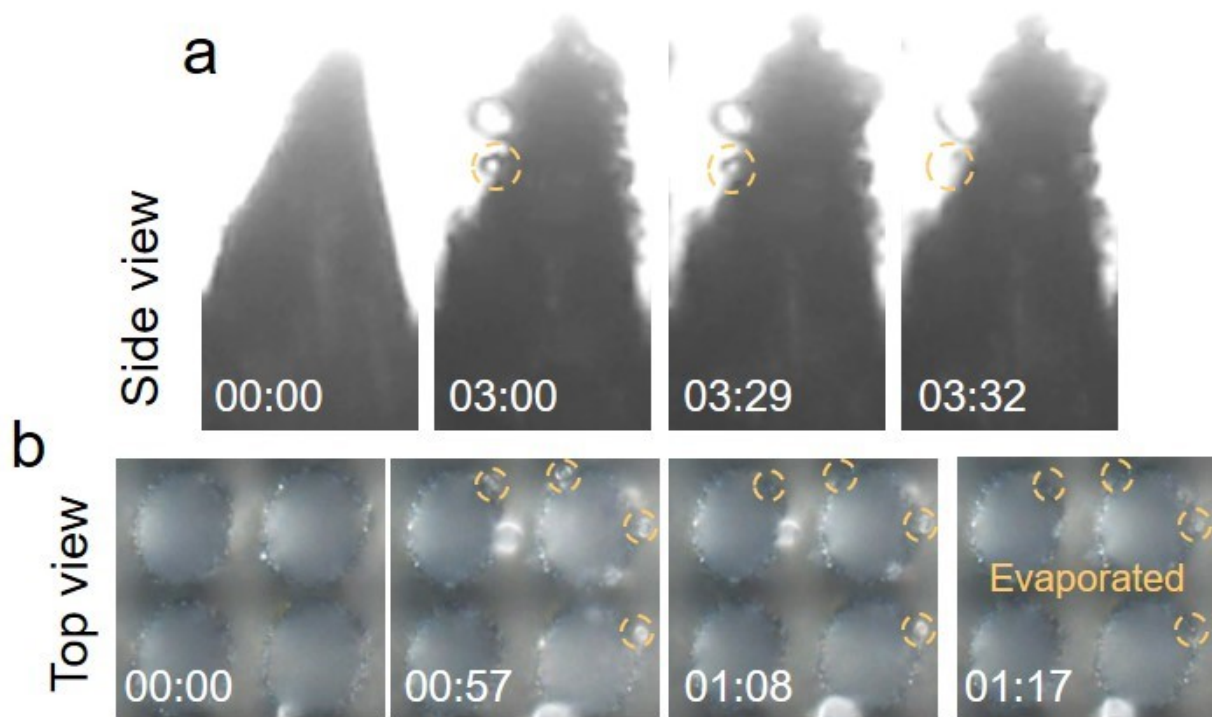

**Fig. S17** Side and Top observations of condensation processes on open-cell structures. (a) Side view. (b) Top view. Condensates are marked by yellow dashed rounds. The recorded time is also displayed. The experimental methods are described in Experimental sections, which are same as those in Figure 6.

## References

- S1. S. A. Kulinich and M. Farzaneh, *Langmuir*, 2009, **25**, 8854-8856.
- S2. S. Zheng, C. Li, Q. Fu, T. Xiang, W. Hu, J. Wang, S. Ding, P. Liu and Z. Chen, *RSC Advances*, 2016, **6**, 79389-79400.
- S3. C. Chen, Z. Tian, X. Luo, G. Jiang, X. Hu, L. Wang, R. Peng, H. Zhang and M. Zhong, *ACS Applied Materials & Interfaces*, 2022, **14**, 23973-23982.
- S4. P. Wang, Z. Li, Q. Xie, W. Duan, X. Zhang and H. Han, *Journal of Bionic Engineering*, 2021, **18**, 55-64.
- S5. M. I. Jamil, X. Zhan, F. Chen, D. Cheng and Q. Zhang, *ACS Applied Materials & Interfaces*, 2019, **11**, 31532-31542.
- S6. L. Pan, F. Wang, X. Pang, L. Zhang and J. Hao, *Journal of Materials Science*, 2019, **54**, 14728-14741.
- S7. J. Ou, Q. Shi, Z. Wang, F. Wang, M. Xue, W. Li and G. Yan, *Science China Physics, Mechanics & Astronomy*, 2015, **58**, 1-8.
- S8. R. Pan, H. Zhang and M. Zhong, *ACS Applied Materials & Interfaces*, 2021, **13**, 1743-1753.
- S9. R. Pan, H. Zhang and M. Zhong, *Chinese Journal of Lasers*, 2021, **48**, 0202009.
- S10. V. Vercillo, S. Tonnichchia, J.-M. Romano, A. García-Girón, A. I. Aguilar-Morales, S. Alamri, S. Dimov, T. Kunze, A. F. Lasagni and E. Bonaccorso, *Advanced Functional Materials*, 2020, **30**, 1910268.
- S11. C. Chen, Z. Tian, X. Luo, G. Jiang, X. Hu, L. Wang, R. Peng, H. Zhang and M. Zhong, *Chemical Engineering Journal*, 2022, **450**, 137936.
- S12. R. Pan, H. Zhang and M. Zhong, *ACS Applied Materials & Interfaces*, 2020, **13**.

- S13. Z. Hong, M. Xue, Y. Luo, Z. Yin, C. Xie, J. Ou and F. Wang, *Journal of Applied Polymer Science*, 2021, **138**, 49657.
- S14. N. Wang, L. Tang, W. Tong and D. Xiong, *Materials & Design*, 2018, **156**, 320-328.
- S15. M. Jin, Y. Shen, X. Luo, J. Tao, Y. Xie, H. Chen and Y. Wu, *Applied Surface Science*, 2018, **455**, 883-890.
- S16. K. Maghsoudi, E. Vazirinasab, G. Momen and R. Jafari, *Journal of Materials Processing Technology*, 2021, **288**, 116883.
- S17. Y. Hou and K. L. Choy, *Progress in Organic Coatings*, 2022, **163**, 106637.
- S18. V. Vercillo, DOI: 10.13140/RG.2.2.21398.47688, 2020.
- S19. S. Milles, V. Vercillo, S. Alamri, A. I. Aguilar-Morales, T. Kunze, E. Bonaccorso and A. F. Lasagni, *Nanomaterials*, 2021, **11**, 135.
- S20. H. Xie, X. Zhao, B. Li, J. Zhang, J. Wei and J. Zhang, *New Journal of Chemistry*, 2021, **45**, 10409-10417.
- S21. X. Wu, Y. Shen, S. Zheng, Z.-T. Hu and Z. Chen, *Langmuir*, 2020, **36**, 12190-12201.
- S22. Y. Zhao, Y. Liu, Q. Liu, W. Guo, L. Yang and D. Ge, *Materials Letters*, 2018, **233**, 263-266.
